# Supplementary material for: Optimization and Clinical Evaluation of a Multi-Target Loop-Mediated Isothermal Amplification Assay for the Detection of SARS-CoV-2 in Nasopharyngeal Samples
Source: MDPI journal article supplement (doi:10.3390/v13050940), 2021-05-19
Supplement: s1 [file s1]

**Table S1.** Detailed results of the nasopharyngeal swabs analyzed in the current study by Allplex 2019-nCoV and RT-LAMP

| Sample | <i>E</i> gene | RT-qPCR (Cq)       |               | IC    | ORF 8 | RT-LAMP |              |
|--------|---------------|--------------------|---------------|-------|-------|---------|--------------|
|        |               | <i>RdRp/S</i> gene | <i>N</i> gene |       |       | ORF 3a  | GMP <i>N</i> |
| 1      | 13.06         | 15.41              | 13.03         | 24.41 | +     | +       | +            |
| 2      | 12.95         | 15.91              | 12.68         | 24.17 | +     | +       | +            |
| 3      | 16.03         | 15.89              | 15.39         | 23.24 | +     | +       | +            |
| 4      | 16.54         | 17.27              | 14.77         | 23.71 | +     | +       | +            |
| 5      | 16.64         | 16.21              | 16.13         | 24.11 | +     | +       | +            |
| 6      | 17.10         | 17.23              | 15.47         | 23.85 | +     | +       | +            |
| 7      | 18.56         | 18.26              | 18.11         | 24.54 | +     | +       | +            |
| 8      | 19.01         | 18.56              | 18.29         | 31.33 | -     | -       | -            |
| 9      | N/A           | 19.50              | 17.80         | 23.01 | +     | +       | +            |
| 10     | 19.64         | 19.53              | 19.00         | 25.18 | +     | +       | +            |
| 11     | 19.93         | 19.22              | 19.35         | 26.03 | -     | -       | +            |
| 12     | 19.9          | 19.50              | 19.96         | 24.54 | +     | +       | +            |
| 13     | 20.71         | 21.25              | 18.30         | 24.02 | +     | +       | +            |
| 14     | 20.41         | 19.46              | 20.43         | 22.62 | +     | +       | +            |
| 15     | 21.28         | 20.55              | 19.97         | 24.41 | +     | +       | +            |
| 16     | 22.07         | 20.71              | 21.18         | 22.97 | +     | +       | +            |
| 17     | 22.87         | 22.32              | 21.77         | 23.06 | +     | +       | +            |
| 18     | 23.39         | 23.14              | 21.62         | 24.94 | +     | +       | +            |
| 19     | 23.73         | 24.11              | 21.03         | 24.49 | +     | +       | +            |
| 20     | 23.27         | 24.89              | 21.88         | 25.38 | +     | +       | +            |
| 21     | 22.81         | 25.04              | 22.20         | 25.63 | +     | +       | +            |
| 22     | 23.31         | 24.43              | 22.58         | 24.64 | +     | +       | +            |
| 23     | 23.98         | 24.96              | 23.65         | 24.09 | +     | +       | +            |
| 24     | 25.61         | 24.95              | 22.20         | 25.53 | -     | -       | +            |
| 25     | 24.08         | 25.62              | 24.48         | 25.70 | +     | -       | +            |
| 26     | 25.10         | 25.70              | 24.81         | 25.23 | +     | -       | +            |
| 27     | 28.58         | 28.87              | 27.83         | 24.51 | +     | -       | +            |
| 28     | 29.78         | 29.96              | 28.16         | 28.96 | +     | -       | +            |
| 29     | 30.15         | 30.20              | 29.10         | 24.61 | -     | -       | +            |
| 30     | 30.44         | 30.50              | 29.51         | 24.59 | +     | -       | +            |
| 31     | 32.29         | 31.97              | 30.98         | 24.11 | -     | -       | +            |
| 32     | 32.10         | 34.43              | 30.32         | 26.75 | -     | -       | -            |
| 33     | 31.94         | 32.37              | 34.00         | 25.02 | -     | -       | -            |
| 34     | 36.78         | 35.00              | 34.89         | 22.93 | -     | -       | -            |
| 35     | 36.00         | 37.83              | 34.76         | 25.98 | -     | -       | -            |
| 36     | N/A           | 35.68              | 37.34         | 24.37 | -     | -       | -            |
| 37     | N/A           | 38.07              | 35.81         | 22.80 | -     | -       | -            |
| 38     | N/A           | N/A                | 37.00         | 25.99 | -     | -       | -            |
| 39     | N/A           | 38.17              | 35.89         | 24.17 | -     | -       | -            |
| 40     | 39.24         | N/A                | 35.10         | 23.99 | -     | -       | +            |
| 41     | N/A           | 38.61              | 36.45         | 24.30 | -     | -       | -            |
| 42     | 38.14         | 36.96              | N/A           | 23.86 | -     | -       | -            |
| 43     | 37.75         | N/A                | 37.42         | 23.72 | -     | -       | -            |
| 44     | 37.62         | N/A                | N/A           | 24.35 | -     | -       | -            |
| 45     | N/A           | N/A                | 38.07         | 24.06 | -     | -       | -            |
| 46     | N/A           | N/A                | 38.11         | 26.15 | -     | -       | -            |
| 47     | 38.14         | N/A                | N/A           | 24.14 | -     | -       | -            |
| 48     | N/A           | 38.51              | N/A           | 24.18 | -     | -       | -            |
| 49     | 38.66         | N/A                | N/A           | 24.00 | -     | -       | -            |
| 50     | N/A           | N/A                | N/A           | 26.68 | -     | -       | -            |
| 51     | N/A           | N/A                | N/A           | 26.88 | -     | -       | -            |
| 52     | N/A           | N/A                | N/A           | 33.52 | -     | -       | -            |
| 53     | N/A           | N/A                | N/A           | 25.84 | -     | -       | -            |
| 54     | N/A           | N/A                | N/A           | 25.92 | -     | -       | -            |

|     |     |     |     |       |   |   |   |
|-----|-----|-----|-----|-------|---|---|---|
| 55  | N/A | N/A | N/A | 26.29 | - | - | - |
| 56  | N/A | N/A | N/A | 33.87 | - | - | - |
| 57  | N/A | N/A | N/A | 26.22 | - | - | - |
| 58  | N/A | N/A | N/A | 25.40 | - | - | - |
| 59  | N/A | N/A | N/A | 25.60 | - | - | - |
| 60  | N/A | N/A | N/A | 26.13 | - | - | - |
| 61  | N/A | N/A | N/A | 25.72 | - | - | - |
| 62  | N/A | N/A | N/A | 25.96 | - | - | - |
| 63  | N/A | N/A | N/A | 26.05 | - | - | - |
| 64  | N/A | N/A | N/A | 26.40 | - | - | - |
| 65  | N/A | N/A | N/A | 26.14 | - | - | - |
| 66  | N/A | N/A | N/A | 26.27 | - | - | - |
| 67  | N/A | N/A | N/A | 26.33 | - | - | - |
| 68  | N/A | N/A | N/A | 26.59 | - | - | - |
| 69  | N/A | N/A | N/A | 26.53 | - | - | - |
| 70  | N/A | N/A | N/A | 26.56 | - | - | - |
| 71  | N/A | N/A | N/A | 27.21 | - | - | - |
| 72  | N/A | N/A | N/A | 25.97 | - | - | - |
| 73  | N/A | N/A | N/A | 25.93 | - | - | - |
| 74  | N/A | N/A | N/A | 26.14 | - | - | - |
| 75  | N/A | N/A | N/A | 25.96 | - | - | - |
| 76  | N/A | N/A | N/A | 25.58 | - | - | - |
| 77  | N/A | N/A | N/A | 26.59 | - | - | - |
| 78  | N/A | N/A | N/A | 26.34 | - | - | - |
| 79  | N/A | N/A | N/A | 25.52 | - | - | - |
| 80  | N/A | N/A | N/A | 26.91 | - | - | - |
| 81  | N/A | N/A | N/A | 26.19 | - | - | - |
| 82  | N/A | N/A | N/A | 25.73 | - | - | - |
| 83  | N/A | N/A | N/A | 25.65 | - | - | - |
| 84  | N/A | N/A | N/A | 26.39 | - | - | - |
| 85  | N/A | N/A | N/A | 32.69 | - | - | - |
| 86  | N/A | N/A | N/A | 26.79 | - | - | - |
| 87  | N/A | N/A | N/A | 26.44 | - | - | - |
| 88  | N/A | N/A | N/A | 26.50 | - | - | - |
| 89  | N/A | N/A | N/A | 26.58 | - | - | - |
| 90  | N/A | N/A | N/A | 27.16 | - | - | - |
| 91  | N/A | N/A | N/A | 26.18 | - | - | - |
| 92  | N/A | N/A | N/A | 27.44 | - | - | - |
| 93  | N/A | N/A | N/A | 27.25 | - | - | - |
| 94  | N/A | N/A | N/A | 24.81 | - | - | - |
| 95  | N/A | N/A | N/A | 24.70 | - | - | - |
| 96  | N/A | N/A | N/A | 24.62 | - | - | - |
| 97  | N/A | N/A | N/A | 25.08 | - | - | - |
| 98  | N/A | N/A | N/A | 24.78 | - | - | - |
| 99  | N/A | N/A | N/A | 24.56 | - | - | - |
| 100 | N/A | N/A | N/A | 24.77 | - | - | + |
| 101 | N/A | N/A | N/A | 25.57 | - | - | - |
| 102 | N/A | N/A | N/A | 24.49 | - | - | - |
| 103 | N/A | N/A | N/A | 24.76 | - | - | - |
| 104 | N/A | N/A | N/A | 25.37 | - | - | - |
| 105 | N/A | N/A | N/A | 25.33 | - | - | - |
| 106 | N/A | N/A | N/A | 24.86 | - | - | - |
| 107 | N/A | N/A | N/A | 29.86 | - | - | - |
| 108 | N/A | N/A | N/A | 24.95 | - | - | - |
| 109 | N/A | N/A | N/A | 24.95 | - | - | - |
| 110 | N/A | N/A | N/A | 24.59 | - | - | - |
| 111 | N/A | N/A | N/A | 30.45 | - | - | - |
| 112 | N/A | N/A | N/A | 25.13 | - | - | - |
| 113 | N/A | N/A | N/A | 24.79 | - | - | - |

|     |     |     |     |       |   |   |   |
|-----|-----|-----|-----|-------|---|---|---|
| 114 | N/A | N/A | N/A | 25.06 | - | - | - |
| 115 | N/A | N/A | N/A | 30.77 | - | - | - |
| 116 | N/A | N/A | N/A | 25.67 | - | - | - |
| 117 | N/A | N/A | N/A | 26.85 | - | - | - |
| 118 | N/A | N/A | N/A | 24.11 | - | - | - |
| 119 | N/A | N/A | N/A | 23.94 | - | - | - |
| 120 | N/A | N/A | N/A | 24.18 | - | - | - |
| 121 | N/A | N/A | N/A | 24.04 | - | - | - |
| 122 | N/A | N/A | N/A | 23.94 | - | - | - |
| 123 | N/A | N/A | N/A | 24.01 | - | - | - |
| 124 | N/A | N/A | N/A | 30.50 | - | - | - |
| 125 | N/A | N/A | N/A | 23.90 | - | - | - |
| 126 | N/A | N/A | N/A | N/A   | - | - | - |
| 127 | N/A | N/A | N/A | 23.95 | - | - | - |
| 128 | N/A | N/A | N/A | 24.48 | - | - | - |
| 129 | N/A | N/A | N/A | 23.97 | - | - | - |
| 130 | N/A | N/A | N/A | 24.38 | - | - | - |
| 131 | N/A | N/A | N/A | 24.06 | - | - | - |
| 132 | N/A | N/A | N/A | 24.00 | - | - | - |
| 133 | N/A | N/A | N/A | 23.94 | - | - | - |
| 134 | N/A | N/A | N/A | 24.88 | - | - | - |
| 135 | N/A | N/A | N/A | 23.97 | - | - | - |
| 136 | N/A | N/A | N/A | 24.09 | - | - | - |
| 137 | N/A | N/A | N/A | 23.95 | - | - | - |
| 138 | N/A | N/A | N/A | 24.13 | - | - | - |
| 139 | N/A | N/A | N/A | 24.17 | - | - | - |
| 140 | N/A | N/A | N/A | 24.12 | - | - | - |
| 141 | N/A | N/A | N/A | 24.88 | - | - | - |
| 142 | N/A | N/A | N/A | 24.14 | - | - | - |
| 143 | N/A | N/A | N/A | 24.84 | - | - | - |
| 144 | N/A | N/A | N/A | 24.21 | - | - | - |
| 145 | N/A | N/A | N/A | 24.31 | - | - | - |
| 146 | N/A | N/A | N/A | 24.43 | - | - | - |
| 147 | N/A | N/A | N/A | 24.79 | - | - | - |
| 148 | N/A | N/A | N/A | 24.32 | - | - | - |
| 149 | N/A | N/A | N/A | 28.84 | - | - | - |
| 150 | N/A | N/A | N/A | 24.64 | - | - | - |
| 151 | N/A | N/A | N/A | 24.39 | - | - | - |
| 152 | N/A | N/A | N/A | 24.46 | - | - | - |

---

N/A and "-" indicate "not detected". IC is the Internal Control of the RT-qPCR.

**Table S2.** Genes, primers and probes used for *in house* RT-qPCR.

| Target                         | Primer                  | Sequence                                                                                | Reference    |
|--------------------------------|-------------------------|-----------------------------------------------------------------------------------------|--------------|
| <i>RdRp</i> gene /<br>nCoV_IP2 | nCoV_IP2-12669Fw        | ATGAGCTTAGTCCTGTTG                                                                      | [5]          |
|                                | nCoV_IP2-12759Rv        | CTCCCTTTGTTGTGTTGT                                                                      |              |
|                                | nCoV_IP2-12696bProbe(+) | <sup>FAM</sup> AGATGTCCTTGCTGCCGGTA<br>IABkFQ                                           |              |
| <i>RdRp</i> gene /<br>nCoV_IP4 | nCoV_IP4-14059Fw        | GGTAACTGGTATGATTTTCG                                                                    | [6]          |
|                                | nCoV_IP4-14146Rv        | CTGGTCAAGGTTAATATAGG                                                                    |              |
|                                | nCoV_IP4-14084Probe(+)  | <sup>HEX</sup> TCATACAAACCACGCCAGG <sup>IABkFQ</sup><br>ACAGGTACGTTAATAGTTAA-<br>TAGCGT |              |
| N                              | E_Sarbeco_F1            | ATATTGCAGCAGTACGCACACA                                                                  | [6]          |
|                                | E_Sarbeco_R2            | <sup>FAM</sup> ACAC-                                                                    |              |
|                                | E_Sarbeco_P1            | TAGCCATCCTTACTGCGCTTCG <sup>IABkFQ</sup>                                                |              |
| S                              | nCoV-2S_134.750F        | TCCTGGTGATTCTTCTTCAGGT                                                                  | This project |
|                                | nCoV-2S_134.883R        | GGTCAAGTGCACAGTCTACAGC<br>AT-                                                           |              |
|                                | nCoV-2S_134.776P        | <sup>TO550N</sup> CAGCTGGTGCTGCAGCTTATT<br>A <sup>IABRQSp</sup>                         |              |

Reactions performed in a final volume of 20 µL with 3 µL of RNA template using the One-step NZYSpeedy RT-qPCR Probe kit, ROX from NZYTech. Primers and probes concentrations used were as detailed in the protocol of the Institute Pasteur, regarding the S gene 400 nM primers and 200 nM probe, were used.
